# Supplementary material
Source: Research Square preprint supplement (doi:10.21203/rs.3.rs-9497163/v1)

**A** consensus matrix legend

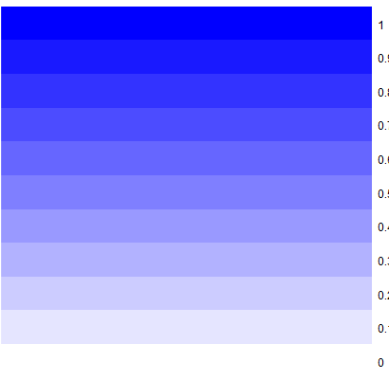

**B** consensus matrix k=3

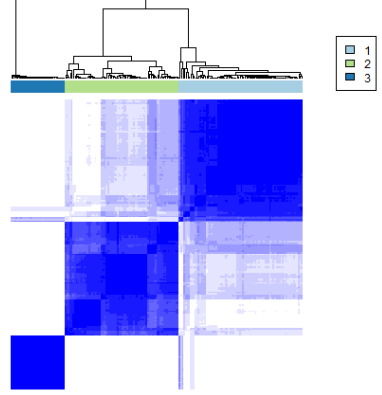

**C** consensus matrix k=4

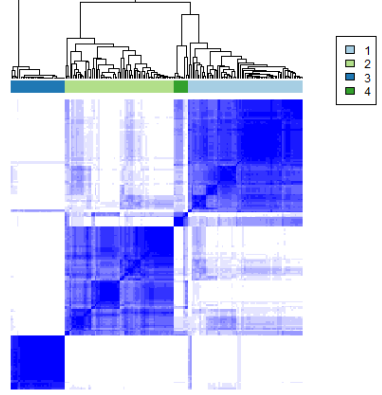

**D** consensus matrix k=5

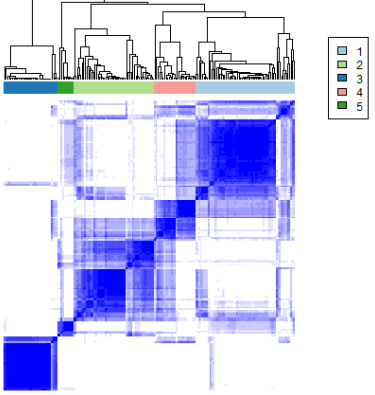

**E** consensus matrix k=6

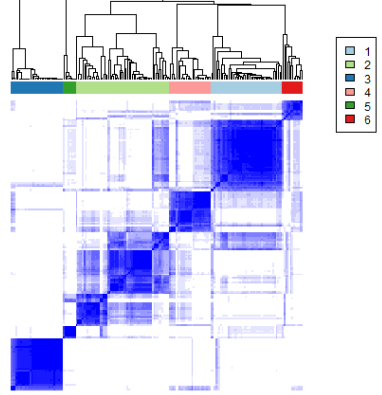

Supplement: Supplementary file 1 [file 2a8614ad862ed541d36c946d.pdf]
