# Supplementary material
Source: Research Square preprint supplement (doi:10.21203/rs.3.rs-9497163/v1)
Supplement: Supplementary file 5 [file b582ec307322f531c4fa1f53.docx]

**Supplementary Material 1: Supplemental Table S1:** PTM gene list used for downstream analyses. **Supplemental Table S2:** PTM-related differentially expressed genes in UC. **Supplemental Table S3:** Activity-associated PTM-related differentially expressed genes.

**Supplementary Material 2: Supplemental Fig. S2:** Consensus clustering results across different cluster numbers for PTM-associated molecular subtypes.(A) Color scale legend for the consensus matrix. (B–E) Consensus matrices for k = 3, 4, 5, and 6.**Supplemental Table S4:** Differentially expressed genes between Cluster 1 and Cluster 2.

**Supplementary Material 3: Supplementary Material 3**: **Supplementary Table 3：**Genes in the cyan module. Supplementary. **Material 3**: **Supplementary Table 3：**Genes in the greenyellow module.

**Supplementary Material 4: Supplemental Fig. S4:** GO enrichment analysis of distinct biological programs between UC subtypes.(A) GO-CC enrichment results between UC subtypes. (B) GO-MF enrichment results between UC subtypes. (C) GO-BP enrichment results between UC subtypes.

**Supplementary Material 5: Supplemental Fig. S5:** Additional evaluation and interpretability of the seven-gene signature.(A) ROC analysis of each gene in the seven-gene signature. (B) SHAP summary (beeswarm) plot showing global feature contributions. (C) SHAP dependence plots illustrating feature effects on SHAP values. **Supplementary Material 7: Supplemental Table 1:** Gene sets of all PTM types. **Supplementary Material 8: Supplemental Table 2:** shRNA sequences. **Supplementary Material 9: Supplemental Table 3:** PCR primer sequences. **Supplementary Material 10: Supplemental Table 4:** Model genes.

**Supplementary Material 6: Supplemental Fig. S6.** Additional gene–immune cell correlation analyses in UC subtypes. (A) Scatter plots showing representative correlations between key genes and inferred immune-cell fractions, with linear regression lines and correlation statistics. (B) Heatmap summarizing gene–immune cell correlations across immune cell types.

**Supplementary Material 7: Supplemental Fig. S7:** Supporting plots for single-cell analysis.(A) PCA plot colored by sample identity (*orig.ident*). (B) Elbow plot showing the standard deviation of principal components. (C) Identification of highly variable genes based on the mean–variance relationship, with representative genes labeled. (D) Scatter plots showing relationships among QC metrics (*nCount_RNA*, *nFeature_RNA*, *percent.mt*, and *percent.HB*). (E) Violin plots summarizing the distributions of QC metrics across cells.
