# Supplementary material
Source: Research Square preprint supplement (doi:10.21203/rs.3.rs-9497163/v1)

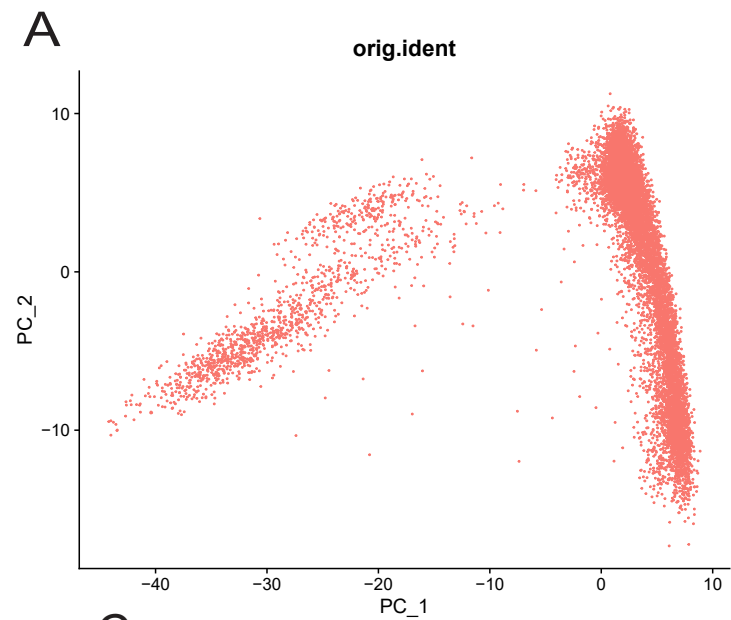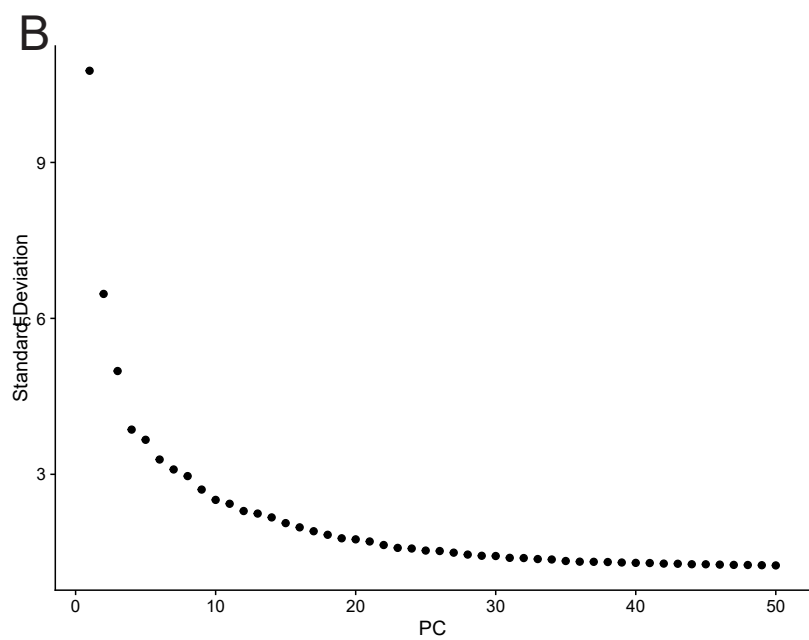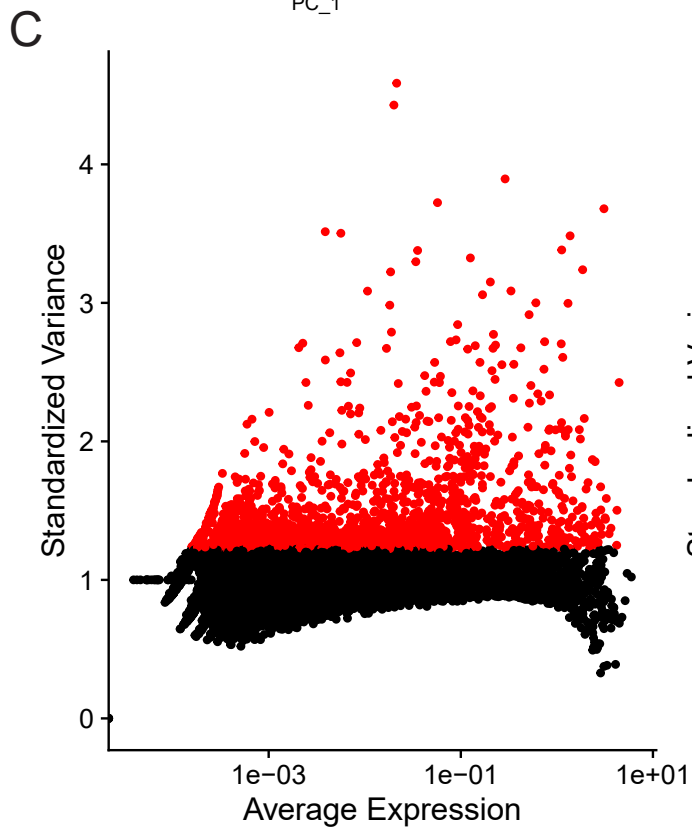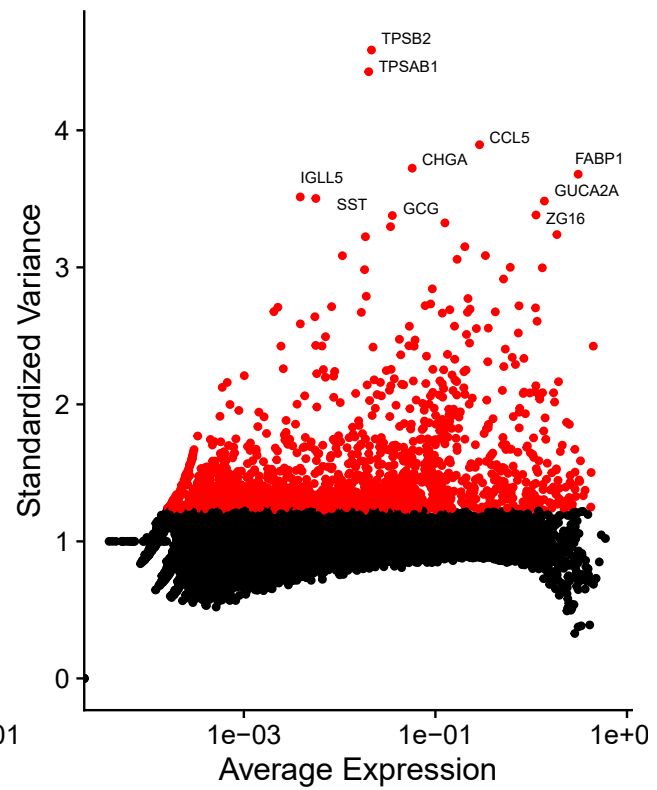

• Non-variable count: 20607 • Variable count: 2000

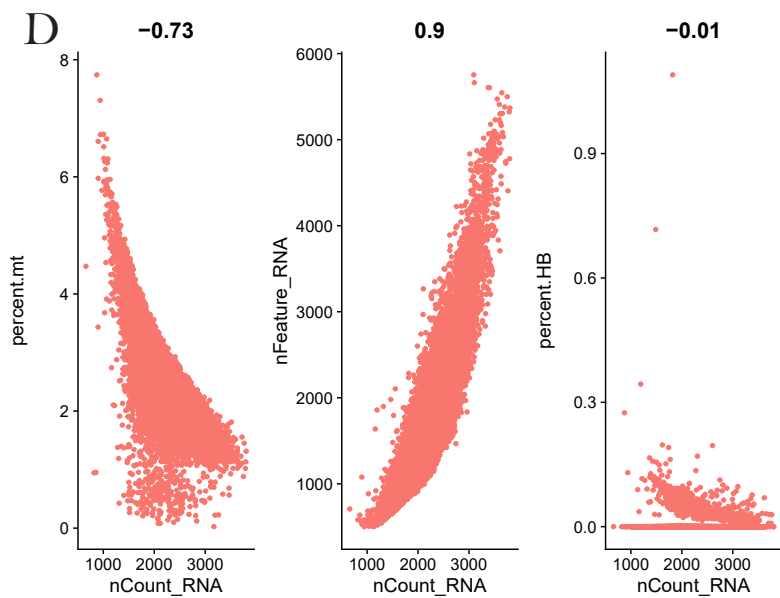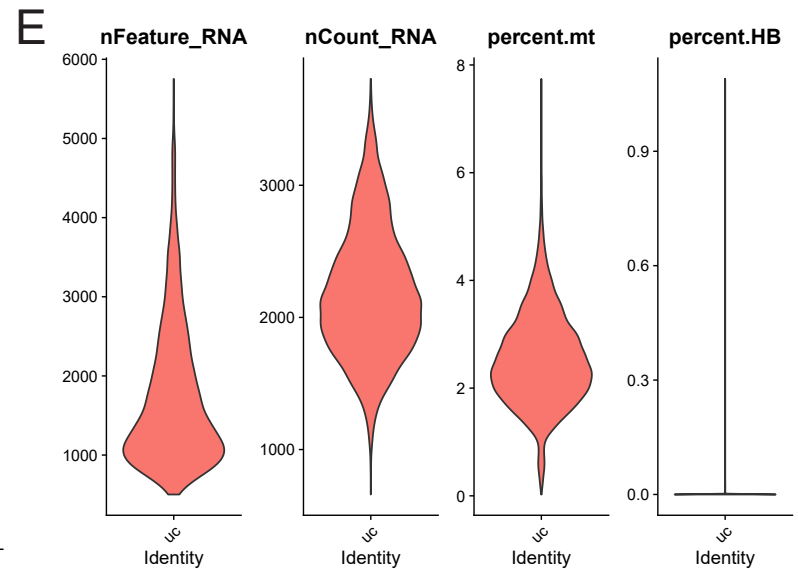

Supplement: Supplementary file 2 [file ac963138a9a4092fb2977707.pdf]

**A****Gene ROC Analysis**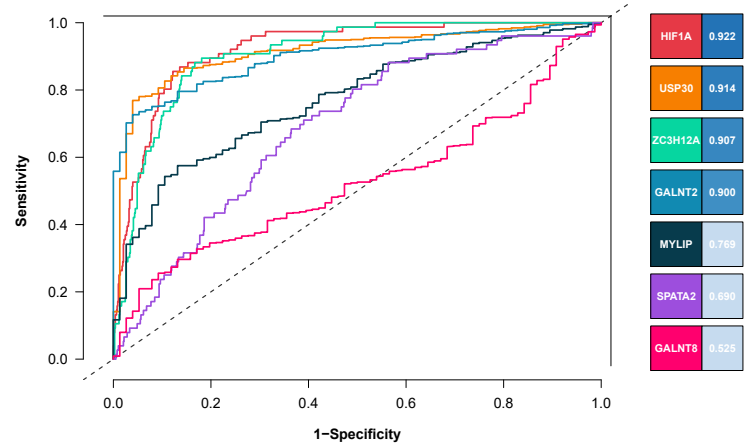**B**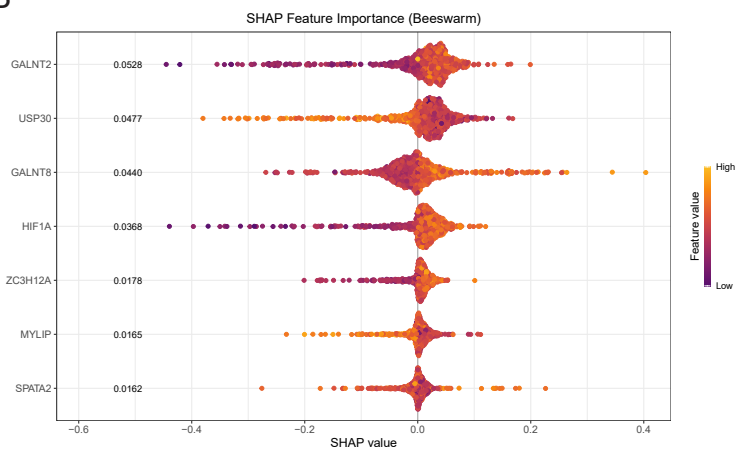**C**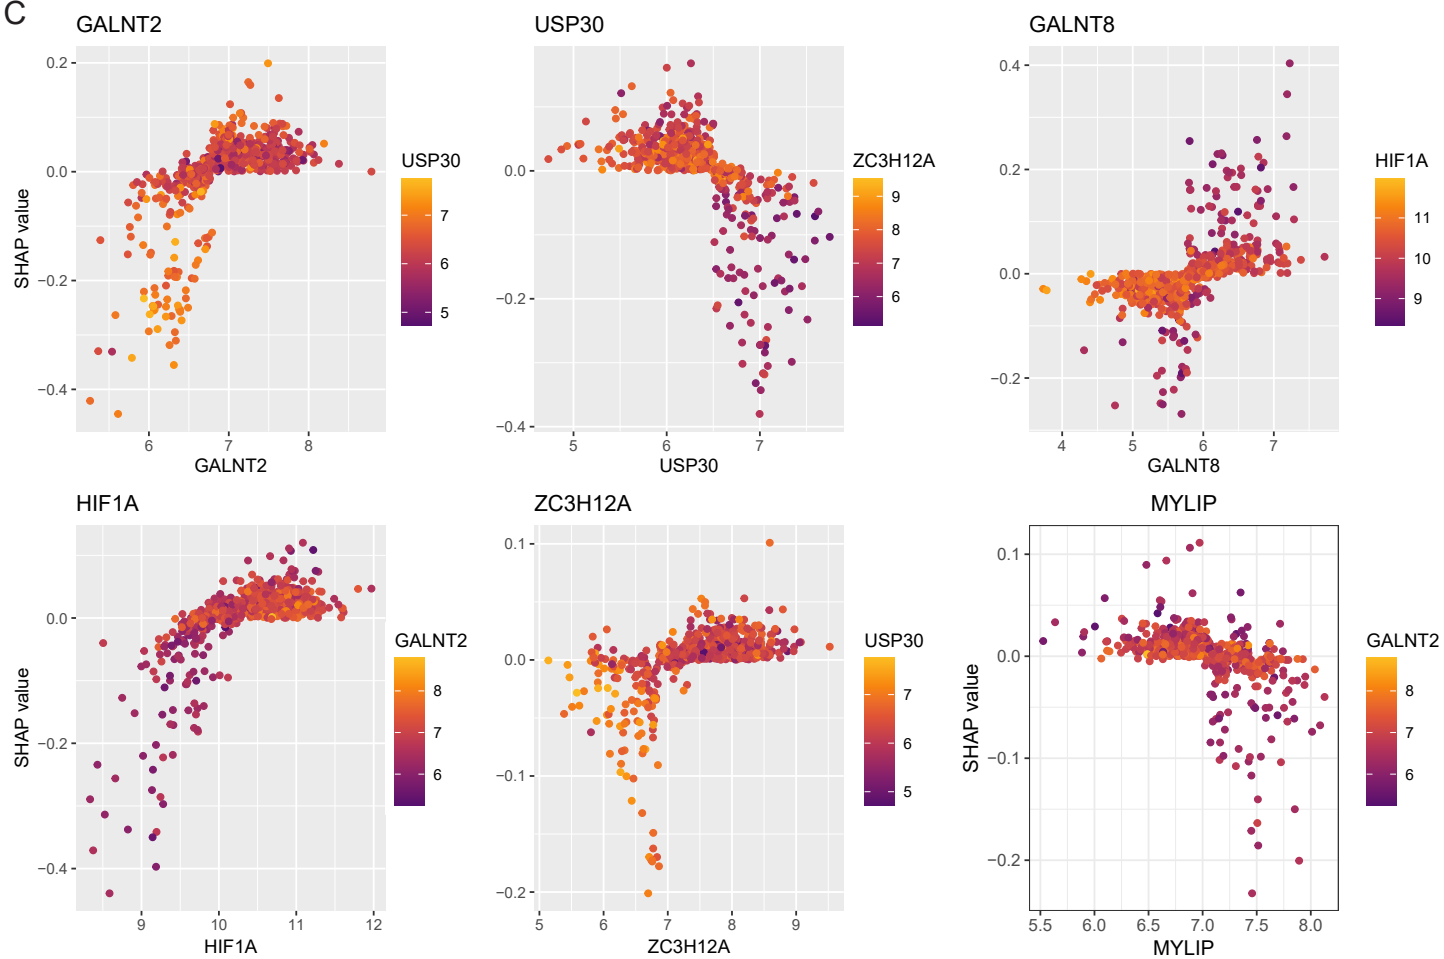

Supplement: Supplementary file 3 [file b0139d7f9226c2f41d0d085d.pdf]

**A**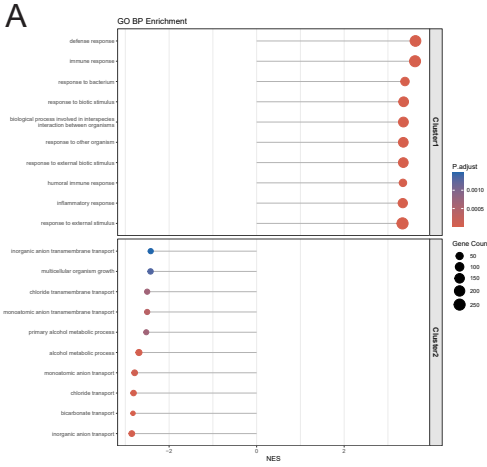**B**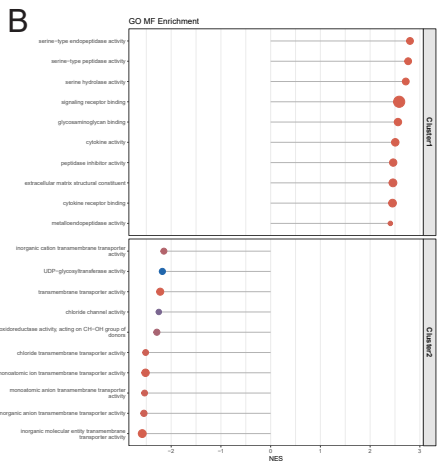**C**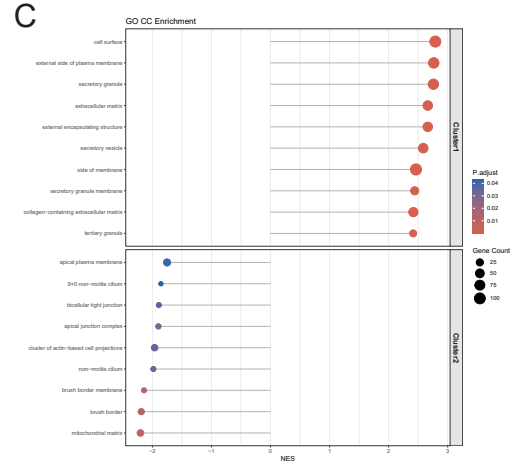

Supplement: Supplementary file 4 [file b1c60a102f9888eeefae65b0.pdf]
